# Supplementary material for: Karymsky volcano eruptive plume properties based on MISR multi-angle imagery and the volcanological implications
Source: Copernicus journal article supplement (doi:10.5194/acp-18-3903-2018), 2018-03-20
Supplement: Supplementary file 1 [file Info_File.docx]

***Supporting Information for:***

**Karymsky volcano eruptive plume properties based on MISR multi-angle imagery and the volcanological implications**

Verity J. B. Flower1, 2 and Ralph A. Kahn1

1Climate and Radiation Laboratory, Earth Science Division, NASA Goddard Space Flight Center, Greenbelt, MD 20771, USA

2Universities Space Research Association, 7178 Columbia Gateway Drive, Columbia, MD 21046, USA

**Contents:**

1-5 MISR RA output, MINX plume height retrievals and wind speed profiles for Karymsky plumes

6 Excel spreadsheet including:

A GVP_Reports

B MISR

**Introduction**

Image files:

MISR Research Aerosol (RA) retrieval algorithm particle property analysis for individual Karymsky plumes (over ocean retrievals only). Retrievals are aggregated to a ~10km grid. Particle types:

Small, spherical, absorbing (SmSpHab(f), SmSpHab(s), SmSpMab(f));

Small, spherical, non-absorbing (SmSpNab);

Medium-small, spherical, non-absorbing (MsSpNab);

Medium, spherical, non-absorbing (MeSpNab);

Large, spherical, non-absorbing (LaSpNab);

Medium, weakly-absorbing dust grains (MdNspWab);

Large, spheroids, weakly absorbing (LaSpdWab)

Corresponding MISR INteractive eXplorer (MINX) output, containing:

Map view of stereo-derived plume heights;

Graph view of stereo-derived plume height with distance from initiation point;

Wind speeds derived from apparent plume motion occurring between the each camera observation obtained from MISR (<7 min).

Retrievals are labeled with: plume identification code and class used in the paper.

Note: The elevation scales vary between the panels, and particle concentrations scales vary by component type.

Spreadsheet:

Summary of Global Volcanism reports by year and plume altitude

MISR retrieval products (MINX plume heights –Karymsky; MISR RA whole plume particle fraction – Karymsky & Holuhraun)
