# Supplementary material for: Karymsky volcano eruptive plume properties based on MISR multi-angle imagery and the volcanological implications
Source: Copernicus journal article supplement (doi:10.5194/acp-18-3903-2018), 2018-03-20
Supplement: Supplementary file 2 [file KarymskySupplementalTable.xlsx]

## Sheet: GVP_Reports
GVP Reported Plume Height
Volcano	≤3km	≤5km	≤7km	≤10km	10km+	Total
Karymsky	134	157	48	10	1	350
GVP Karymsky Plume Count by Year (Sub-catagories based on GVP/KVERT report description)
Year	Total
2000	1
2001	1
2002	5
2003	10
2004	26
2005	17
2006	22
2007	28
2008	39
2009	27
2010	39
2011	53
2012	35
2013	6
2014	19
2015	22
2016	0
TOTAL/Volc	350

## Sheet: MISR
Karymsky Volcano
MISR RA Whole Plume Particle Fraction
			Fraction of Total Plume Retrievals (%)
Code	Date	Orbit	Path	Block	SmSpNab	MsSpNab	MeSpNab	LaSpNab	SmSpHab(f)	SmSpHab(s)	SmSpMab(f)	MeNspWab	LaSpdWab
P2003	12/27/2003	21402	99	47	1	0	19	76	4	0	0	0	0
P2004	2004-12-01	21635	99	46-47	1.10424	1.13074	19.3021	71.864	0.441696	0.998233	2.4735	2.68551	0
P2005	08/28/2005	30285	97	47	0.027933	0	0	63.8827	7.48603	0.391061	0.502793	27.6816	0.027933
P2006	10/23/2006	36416	100	47-48	0.477816	0.204778	9.0785	78.7116	0.972696	1.16041	3.92491	5.36689	0.0682594
P2007a	2007-03-09	41003	97	47-49	0.217391	0.200341	3.96846	74.4714	5.70119	0.272805	0.473146	14.6483	0.0468883
P2007b	2007-05-10	41469	97	47-48	2.94075	0	55.8742	6.07901	0.380395	0	0	30.6657	4.05999
P2009	04/26/2009	49755	96	47-48	0.363956	0.270248	3.95833	71.7369	4.96821	0.823293	3.44712	14.3382	0.0937082
P2011a	01/31/2011	59148	99	46-47	0	0	0	93.7706	4.96344	0	0	0.0776965	1.1883
P2011c	2011-02-18	59410	97	46-47	0	0	0	90.3506	6.11688	1.50649	0	2.02597	0
P2011d	2011-07-05	60546	99	47-48	0	1.11825	0	78.0206	2.62211	3.58826	2.56213	11.5317	0.556984
P2011e	2011-12-07	61507	97	47-48	0.452099	0	0	77.7879	5.3014	3.70291	0.645856	12.0129	0.0968784
P2013	2013-06-11	73856	97	47-48	0.101283	0	0	90.2363	3.79136	2.03916	0.114787	3.71708	0
P2015	2015-02-27	80817	99	47-48	0	0	0	94.6693	0.410822	4.65932	0	0.260521	0
P2016	2016-06-10	89365	96	47-48	0	0	0	71.6763	5.63584	3.3526	0	19.0751	0.260116
Karymsky Volcano
MINX Retrieved Plume Height
Code	Date	Orbit	Path	Block	MINX Height Minimum (km)	MINX Height Median (km)	MINX Height Maximum (km)
P2003	12/27/2003	21402	99	47	0.75	1.362	1.928
P2004	2004-12-01	21635	99	46-47	1.5	2.108	3.45
P2005	08/28/2005	30285	97	47	2.3	2.676	2.894
P2006	10/23/2006	36416	100	47-48	1.8	2.958	7.135
P2007a	2007-03-09	41003	97	47-49	2	4.352	6.283
P2007b	2007-05-10	41469	97	47-48	0.5	1.942	4.531
P2009	04/26/2009	49755	96	47-48	0	0.17	2.447
P2011a	01/31/2011	59148	99	46-47	0.75	1.658	3.477
P2011b	2011-02-02	59177	97	47-48	1.2	1.735	3.049
P2011c	2011-02-18	59410	97	46-47	1.25	1.785	2.244
P2011d	2011-07-05	60546	99	47-48	2.2	3.556	4.895
P2011e	2011-12-07	61507	97	47-48	2.8	7.634	8.931
P2013	2013-06-11	73856	97	47-48	0.5	1.04	2.49
P2015	2015-02-27	80817	99	47-48	1.5	2.4	3
P2016	2016-06-10	89365	96	47-48	0.25	0.82	1.568
Holuhraun Volcano (Iceland)
MISR RA Whole Plume Particle Fraction
Code	Date	Orbit	Path	Block	SmSpNab	MsSpNab	MeSpNab	LaSpNab	SmSpHab(f)	SmSpHab(s)	SmSpMab(f)	MeNspWab	LaSpdWab
B2014a	2014-09-02	78232	213	37-38	2.86192	0	54.3766	39.9331	2.18828	0	0	0.560669	0.0794979
B2014b	2014-09-11	78363	212	37-39	4.98232	0	94.6641	0.335905	0.0176792	0	0	0	0
B2014c	2014-09-25	78567	214	36-38	9.71709	0.672308	82.4339	6.03523	0.366034	0	0	0.741033	0.0313744
