# Supplementary material for: Karymsky volcano eruptive plume properties based on MISR multi-angle imagery and the volcanological implications
Source: Copernicus journal article supplement (doi:10.5194/acp-18-3903-2018), 2018-03-20
Supplement: Supplementary file [file acp-18-3903-2018-supplement-title-page.pdf › acp-18-3903-2018-supplement-title-page.pdf]

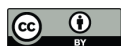

## *Supplement of*

# **Karymsky volcano eruptive plume properties based on MISR multi-angle imagery and the volcanological implications**

**Verity J. B. Flower and Ralph A. Kahn**

*Correspondence to:* Verity J. B. Flower (verity.j.flower@nasa.gov)

- acp-18-3903-2018-supplement-title-page.pdf
- Supplement\_Final
  - Info\_File.docx
  - KarymskyParticlePropertiesSupplementalA.png
  - KarymskyParticlePropertiesSupplementalB.png
  - KarymskyParticlePropertiesSupplementalC.png
  - KarymskyParticlePropertiesSupplementalD.png
  - KarymskyParticlePropertiesSupplementalE.png
  - KarymskySupplementalTable.xlsx

The copyright of individual parts of the supplement might differ from the CC BY 4.0 License.
